# Supplementary material for: Annual high-resolution grazing intensity maps on the Qinghai-Tibet Plateau from 1990 to 2020
Source: Copernicus journal article supplement (doi:10.5194/essd-2023-403), 2023-12-04
Supplement: Supplementary file 2 [file essd-2023-403-supplement.pdf]

1 *Supplement of*  
2 **Annual high-resolution grazing intensity maps on the**  
3 **Qinghai-Tibet Plateau from 1990 to 2020**

4 Jia zhou, Jin Niu, Ning Wu, Tao Lu

5  
6 *Correspondence to:* Tao Lu (lutao@cib.ac.cn)

7  
8  
9  
10  
11  
12  
13  
14  
15  
16  
17  
18  
19  
20  
21  
22  
23  
24  
25  
26  
27  
28  
29  
30  
31  
32  
33  
34  
35  
36  
37  
38  
39  
40  
41

## Supplementary Methods

There is a conspicuous absence of a systematic database with superior spatio-temporal resolution, including population density, temperature, precipitation, and Human-activity-induced Net Primary Productivity (HNPP). The lack of such a comprehensive dataset significantly compromises the empirical robustness of research endeavors in the domain of livestock distribution mapping. Consequently, this study is committed to providing precise and detailed mappings that integrate the aforementioned elements. The subsequent section demonstrated the methodologies employed to generate these comprehensive maps.

### Population density database

*Data source.* The gridded annual population data with a resolution of 100 m spanning from 2000 to 2020 (referred to as Pop I) for this study were acquired from the WorldPop dataset (<https://hub.worldpop.org>, accessed on 5 January 2023). Concurrently, the gridded population data at 1 km resolution with five-year intervals for the period of 1990-2015 (referred to as Pop II) were obtained from the Resource and Environment Science and Data center of the Chinese Academy of Sciences (<https://www.resdc.cn>, accessed on 9 January 2023). Moreover, the demographic data spanning the years 1990-2000 were extracted from the statistical yearbooks of the respective provinces.

*Data processing.* All collected gridded population data were meticulously geo-referenced to the WGS\_1984\_Albers Equal-Area Conic coordinate system, and were subsequently clipped by the comprehensive boundary of the entire Qinghai-Tibetan Plateau (QTP). Furthermore, the PopII dataset was aggregated to a 100 m resolution to maintain consistency. Given the inherent disparities between the Pop I and Pop II datasets—originating from distinct demographic data and divergent methodologies—an integration process was required to prevent data breakage and ensure continuity across datasets. In this study, for the overlapping year of 2000-2015, both Pop I and Pop II data were harmoniously amalgamated to construct a linear regression model, according to the formula 1~3. Subsequently, consistent gridded population data with a spatial resolution of 100 m × 100 m, were generated for the years 1990 to 1999, undergoing stringent quality control procedures utilizing the acquired demographic data.

$$y = ax + b \quad (1)$$

$$a = \frac{\sum_{i=1}^n (x_i - \bar{x})(y_i - \bar{y})}{\sum_{i=1}^n (x_i - \bar{x})^2} \quad (2)$$

$$b = \bar{y} - a\bar{x} \quad (3)$$

where  $y$  is Pop I,  $X$  is Pop II, and  $n$  is the number of samples.

## 75 **Climate database**

76 *Data source.* In the present study, the mean daily temperature and precipitation data of 228  
77 meteorological stations in the QTP and its surrounding areas during 1990-2020 were obtained  
78 from China Meteorological Data Service Center (<http://data.cma.cn>, accessed on 4 January 2023).  
79 The quality and uniformity of the acquired data were assessed and validated by the National  
80 Meteorological Information Center, ensuring the reliability and consistency of the datasets in use.

81 *Data processing.* To avoid the influence of anomalous values, average values were selected for  
82 interpolation of air temperature, while interpolation of precipitation incorporated total values  
83 (Bryan and Adams, 2002). Subsequent to the exclusion of abnormal data, the annual average  
84 temperature and the annual cumulative precipitation for each station were ascertained. Previous  
85 studies reveals that both the ANUSPLIN and Co-Kriging methodologies are typically conducive to  
86 generating robust and reliable estimations for climatic data (Parra and Monahan 2008, Cho et al.  
87 2020, Tan et al. 2021). Consequently, after comparing the results from all possible parameter  
88 combinations, eight models were constructed with three independent variables, including altitude,  
89 slope, and aspect, as detailed in Table S1.

90 The ANUSPLIN model serves as an advanced interpolation technique, proficient in generating  
91 geographically cohesive climate surfaces, utilizing both weather station data and topographical  
92 variables. This model is constructed employing thin-plate smoothing splines, demonstrating a  
93 notable suitability for interpolating climate data characterized by substantial noise, whilst  
94 maintaining a propensity to yield a mean error that is lower compared to alternate interpolation  
95 models (Price et al., 2000; Hutchinson, 2005). The theoretical framework underpinning this model  
96 is articulated through Formula (4), serving as a testament to its mathematical robustness and  
97 empirical reliability in addressing the complexities inherent to climatic data.

$$98 \quad Z_i = f(x_i) + b^T y_i + e_i \quad (i=1, \dots, n) \quad (4)$$

99 where  $Z_i$  represents the predicted value at location  $i$ ;  $x_i$  is the spline independent variable as a  
100 multidimensional vector, and  $f$  represents a smoothing function of  $x_i$  which needs to be estimated;  
101  $y_i$  is the independent covariable as a multidimensional vector, and  $b$  is the unknown coefficients  
102 for the  $y_i$ ;  $n$  is the number of observational data. Each  $e_i$  is an independent, zero mean error term  
103 with variance  $w_i \sigma^2$ , where  $w_i$  is the known relative error variance and  $\sigma^2$  is the error variance  
104 which is constant across all data points.

105 Co-Kriging represents a sophisticated multivariate geostatistical technique, functioning as an  
106 advanced extension of the Ordinary Kriging method, and is adept at transitioning from a singular  
107 spatial random variable to encompassing multiple spatially correlated random variables. This  
108 technique incorporates multiple correlated datasets into the estimation process, typically resulting

109 in predictions characterized by enhanced accuracy (Tajgardan et al., 2010). The mathematical  
 110 theory underpinning Co-Kriging is delineated in Formula (5).

$$111 \quad Z^*(x_0) = \sum_{i=1}^{n_1} \beta_{1i} Z_1(x_{1i}) + \sum_{j=1}^{n_2} \beta_{2j} Z_2(x_{2j}) + \sum_{p=1}^{n_3} \beta_{3p} Z_3(x_{3p}) + \sum_{q=1}^{n_4} \beta_{4q} Z_4(x_{4q}) \quad (5)$$

112 where  $Z^*(X_0)$  is the simulated value of the point  $X_0$  to be evaluated, the measured climate value of  
 113  $Z_l(x_{li})$  is taken as the main variable, and  $Z_2(x_{2j})$ ,  $Z_3(x_{3i})$  and  $Z_4(x_{4i})$  are taken as the covariates;  $\beta$   
 114 represents the weight;  $n$  represents the number of data;  $X_i$ ,  $X_j$ ,  $X_p$  and  $X_q$  represent the location,  
 115 and  $l = 1, 2, 3, \dots, n_1, j = 1, 2, 3, \dots, n_2, p = 1, 2, 3, \dots, n_3, q = 1, 2, 3, \dots, n_4$ .

116

117 Table S1. Interpolation models using different combinations of covariates for prediction of air  
 118 temperature and precipitation

| Climate       | ANUSPLIN |                             | Co-Kriging |                             |
|---------------|----------|-----------------------------|------------|-----------------------------|
| Temperature   | A-T-I    | CV: Altitude                | K-T-I      | CV: Altitude                |
|               | A-T-II   | CV: Altitude; slope; aspect | K-T-II     | CV: Altitude; slope; aspect |
| Precipitation | A-P-I    | CV: Altitude                | K-P-I      | CV: Altitude                |
|               | A-P-II   | CV: Altitude; slope; aspect | K-P-II     | CV: Altitude; slope; aspect |

119 Note: CV is an abbreviation for concomitant variable

120

121 *Model assessment.* To rigorously evaluate the efficacy of the eight models, we engaged in the  
 122 construction and assessment of all predictive models utilizing repeated 10-fold cross-validation  
 123 (Yoo et al., 2018). This method systematically divided the original observation data from the 228  
 124 meteorological stations into ten equitably sized subsamples. Nine of these subsamples were  
 125 deployed in the training process, subsequently generating predictions on the remaining subsample.  
 126 This cross-validation process was then repeated a further nine times, ensuring each observation  
 127 was exclusively used once as validation data. Hence, ten distinctive combinations of training and  
 128 test sets were established, with each pair undergoing comprehensive application and evaluation.  
 129 The conclusive assessment of the 10-fold cross-validation was derived from the average error  
 130 across the ten test sets, culminating in a singular, consolidated estimate.

131 The mean absolute error (MAE) and the root mean square error (RMSE) were employed as  
 132 evaluation metrics to quantify the discrepancies between the forecasted data and the actual  
 133 observed data, serving as indicators of model performance. The MAE and RMSE were computed  
 134 for 56,544 (228×31×8) samples, as detailed in Table S2, to systematically assess the accuracy of  
 135 the models. The optimal model was adjudged based on the relative minimization of both MAE and  
 136 RMSE during the modeling and forecasting stages. The results indicated that the A-T-II model  
 137 exhibited superior performance in predicting temperature, whereas the K-P-I model demonstrated

138 paramount accuracy in forecasting precipitation. Consequently, the A-T-II and K-P-I models were  
 139 deployed to construct the annual temperature and precipitation maps of the QTP spanning the  
 140 period from 1990 to 2020, as illustrated in Figure S1.

141 Table S2. Model performance for the response prediction models

| Climate      | Temperature |        |       |        | Precipitation |         |        |        |
|--------------|-------------|--------|-------|--------|---------------|---------|--------|--------|
| Models       | A-T-I       | A-T-II | K-T-I | K-T-II | A-P-I         | A-P-II  | K-P-I  | K-P-II |
| Test samples | 7068        | 7068   | 7068  | 7068   | 7068          | 7068    | 7068   | 7068   |
| MAE          | 1.506       | 0.998  | 1.89  | 1.91   | 109.509       | 110.614 | 99.05  | 99.47  |
| RMSE         | 2.75        | 1.551  | 2.54  | 2.55   | 172.770       | 175.483 | 147.28 | 147.68 |

142

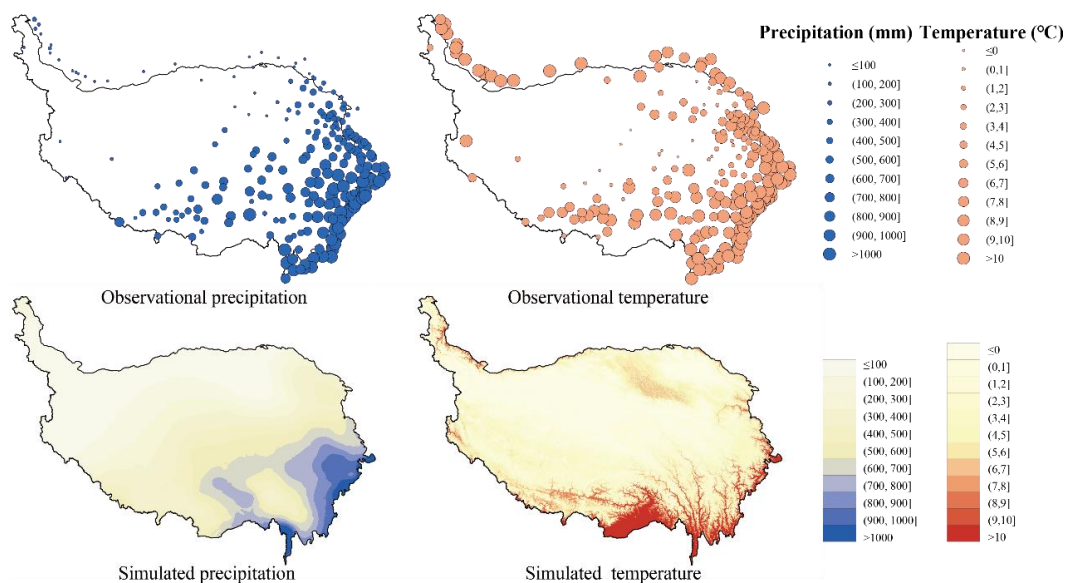

143

144 Figure S1. Distribution of mean cumulative precipitation and mean temperature in the QTP as  
 145 predicted by K-P-I and A-T-II model, respectively

146

### 147 Human-activity-induced Net Primary Productivity (HNPP) database

148 *Data source.* The MOD17A3HGF Version 006 NPP product (referred to as NPP-I) with 500 m  
 149 resolution covering 2000 to 2020 were obtained from the Land Processes Distributed Active  
 150 Archive Center (<https://lpdaac.usgs.gov>, accessed on 18 January 2023). Additionally, the actual  
 151 NPP dataset during 1990-2015 at 1 km resolution (referred to as NPP-II) was derived from the  
 152 MOD17A3 NPP product (<http://www.nts.gov>, accessed on 22 January 2023).

153 *Data processing.* To reconcile the discrepancies inherent between NPP-I and NPP-II datasets, an  
 154 initial re-projection to the WGS\_1984\_Albers Equal-Area Conic coordinate system was  
 155 undertaken. Subsequently, the resolution of NPP-II was resampled to 500-m through the  
 156 employment of the nearest neighbor resampling algorithm. Based on the NPP-I and NPP-II data  
 157 for the overlapping year of 2000-2015, a linear regression correction equation was established in

158 accordance with formula 1~3. Consequently, the consistent gridded NPP data (referred to as  
 159 NPP-III) at 500 m×500 m spatial resolution from 1990 to 2000 was generated.

160 Human-induced NPP (HNPP) is delineated by the discrepancy between the climate-driven  
 161 potential NPP (PNPP) and the actual NPP (ANPP). In this study, the NPP-III data epitomize the  
 162 ANPP, elucidating the extant conditions of vegetative growth. To estimate the PNPP, the  
 163 Thornthwaite Memorial model was utilized, incorporating temperature and precipitation as  
 164 determining variables (Naeem et al. 2020; Yin et al. 2020; Qin et al. 2021). Subsequently, the  
 165 differentiation between PNPP and ANPP was performed to manifest the influence of human  
 166 activities on NPP. HNPP values in the negative spectrum indicate gains in NPP attributable to  
 167 anthropogenic activities, while positive values represent losses in NPP due to human interventions.  
 168 The computations for PNPP and HNPP were conducted as outlined below:

169 
$$PNPP = 3000[1 - e^{-0.0009695(v-20)}] \quad (6)$$

170 
$$v = \frac{1.05r}{\sqrt{1+(1+\frac{1.05r}{L})^2}} \quad (7)$$

171 
$$L = 3000 + 25t + 0.05t^3 \quad (8)$$

172 
$$HNPP = PNPP - ANPP \quad (9)$$

173 where PNPP represents the total annual potential NPP (gC m<sup>-2</sup>),  $v$  represents the annual mean  
 174 actual evapotranspiration (mm),  $L$  represents the annual mean potential evapotranspiration (mm),  $r$   
 175 represents the annual precipitation (mm) and  $t$  represents the average annual temperature (° C).

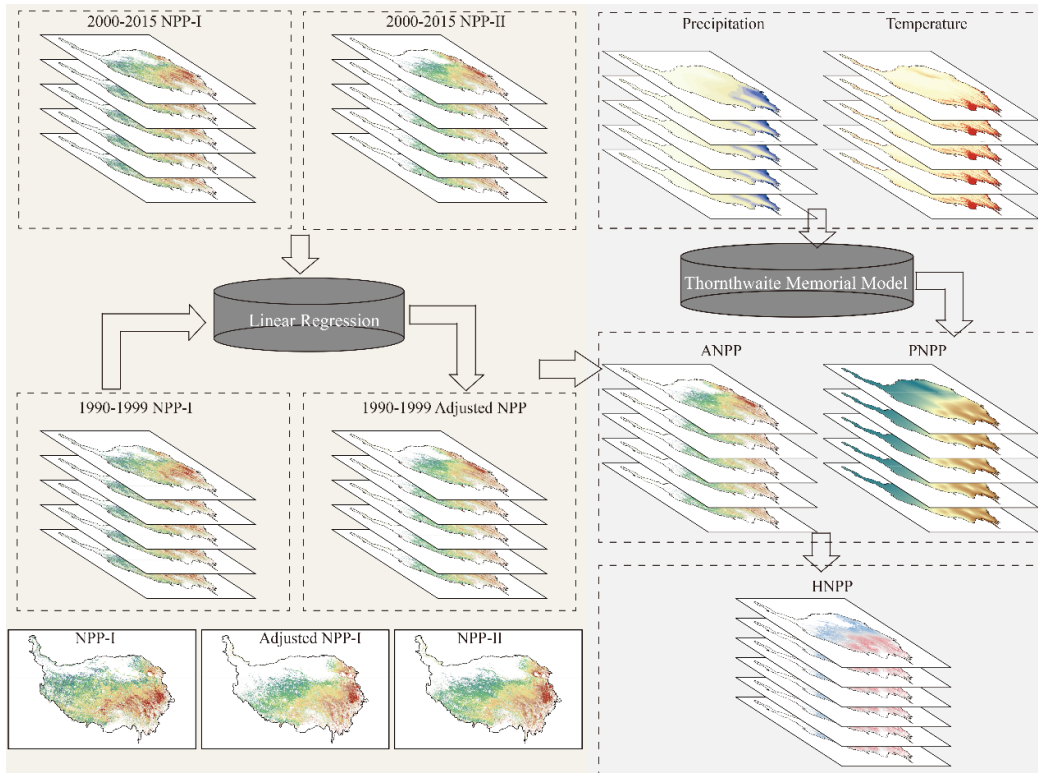

176

177

Figure S2. Technical flowchart for mapping the HNPP on the QTP

178 **References**

- 179 Bryan, B.A. and J.M. Adams. 2002. Three-Dimensional Neurointerpolation of Annual Mean  
180 Precipitation and Temperature Surfaces for China. *Geographical Analysis* 34(2): 93-111.
- 181 Cho, D., C.Yoo, J. Im, Y. Lee, and J. Lee. 2020. Improvement of spatial interpolation accuracy of daily  
182 maximum air temperature in urban areas using a stacking ensemble technique. *GIScience &  
183 Remote Sensing* 57:633-649.
- 184 Hutchinson, M.F., S. McIntyre, R.J. Hobbs, J.L. Stein, S. Garnett, and J. Kinloch. 2005. Integrating  
185 a global agro-climatic classification with bioregional boundaries in Australia. *Global Ecology  
186 and Biogeography* 14: 197-211.
- 187 Naeem, S., Y. Zhang, J. Tian, F. M. Qamer, A. Latif, and P. K. Paul. 2020. Quantifying the Impacts of  
188 Anthropogenic Activities and Climate Variations on Vegetation Productivity Changes in China  
189 from 1985 to 2015. *Remote Sensing* 12(7): 1113.
- 190 Parra, J. L., and W. B. Monahan. 2008. Variability in 20th century climate change reconstructions and  
191 its consequences for predicting geographic responses of California mammals. *Global Change  
192 Biology* 14:2215-2231.
- 193 Price, D.T., D.W. McKenney, I.A. Nalder, M.F. Hutchinson and J.L. Kesteven. 2000. A comparison of  
194 two statistical methods for spatial interpolation of Canadian monthly mean climate data.  
195 *Agricultural and Forest Meteorology* 101: 81-94.
- 196 Qin, X., W. Liu, R. Mao, J. Song, Y. Chen, C. Ma, and M. Li. 2021. Quantitative assessment of driving  
197 factors affecting human appropriation of net primary production (HANPP) in the Qilian  
198 Mountains, China. *Ecological Indicators* 121: 106997.
- 199 Tajgardan, T., S. Ayoubi, S. Shataee, K.L. Sahrawat. 2010. Soil Surface Salinity Prediction Using  
200 ASTER Data: Comparing Statistical and Geostatistical Models. *Australian Journal of Basic  
201 and Applied Sciences*, 4 (3): 457-467.
- 202 Tan, J., X. Xie, J. Zuo, X. Xing, B. Liu, Q. Xia, and Y. Zhang. 2021. Coupling random forest and  
203 inverse distance weighting to generate climate surfaces of precipitation and temperature with  
204 Multiple-Covariates. *Journal of Hydrology* 598: 126270.
- 205 Yoo, C., J. Im, S. Park, L.J. Quackenbush. 2018. Estimation of daily maximum and minimum air  
206 temperatures in urban landscapes using MODIS time series satellite data. *ISPRS Journal of  
207 Photogrammetry and Remote Sensing* 137: 149-162.
- 208 Yin, L., E. F. Dai, D. Zheng, Y. H. Wang, L. Ma, and M. Tong. 2020. What Drives the Vegetation  
209 Dynamics in the Hengduan Mountain Region, Southwest China: Climate Change or Human  
210 Activity? *Ecological Indicators* 112:106013.
